# Supplementary material for: Effectiveness of an Advanced Naloxone Training, Simulation, and Assessment of Second-Year Pharmacy Students
Source: MDPI journal article supplement (doi:10.3390/pharmacy10060153), 2022-11-19
Supplement: s1 [file s1]

**Table S1.** Survey results comparing student perception pre-teaching and post-teaching.

|                                                                                                                               | Pre-teaching<br>answering in<br>the<br>affirmative | Post-teaching<br>answering in<br>the affirmative | Change in the<br>proportion<br>answering in<br>the affirmative<br>post-teaching<br>and pre-<br>teaching<br>(p-value) |
|-------------------------------------------------------------------------------------------------------------------------------|----------------------------------------------------|--------------------------------------------------|----------------------------------------------------------------------------------------------------------------------|
| How familiar are you with the risks of opioid overdose?                                                                       | 36%                                                | 90%                                              | 54% (<0.001)                                                                                                         |
| How familiar are you with the pharmacology of naloxone?                                                                       | 17%                                                | 86%                                              | 69% (<0.001)                                                                                                         |
| Do you believe that utilizing pharmacists to increase naloxone access can save lives?                                         | 92%                                                | 98%                                              | 6% (<0.001)                                                                                                          |
| How familiar are you with the CA BOP protocol for pharmacists to furnish naloxone?                                            | 7%                                                 | 88%                                              | 81% (<0.001)                                                                                                         |
| How comfortable do you feel talking to patients about opioids?                                                                | 24%                                                | 86%                                              | 61% (<0.001)                                                                                                         |
| How comfortable do you feel talking to a patient about naloxone?                                                              | 27%                                                | 86%                                              | 60% (<0.001)                                                                                                         |
| How comfortable do you feel counseling a patient on the administration of intramuscular naloxone in a vial with a syringe?    | 15%                                                | 72%                                              | 57% (<0.001)                                                                                                         |
| How comfortable do you feel counseling a patient on the administration of commercially available Narcan nasal spray?          | 23%                                                | 89%                                              | 67% (<0.001)                                                                                                         |
| How comfortable do you feel counseling a patient on the administration of naloxone nasal spray kit with atomizer/white cones? | 17%                                                | 79%                                              | 62% (<0.001)                                                                                                         |
| How comfortable do you feel counseling a patient on the administration of Evzio?                                              | 9%                                                 | 77%                                              | 69% (<0.001)                                                                                                         |
| How comfortable do you feel selecting the proper naloxone product and route for a patient?                                    | 10%                                                | 83%                                              | 73% (<0.001)                                                                                                         |
| How comfortable do you feel counseling a patient on the effectiveness of naloxone?                                            | 19%                                                | 90%                                              | 71% (<0.001)                                                                                                         |
| How comfortable do you feel counseling a patient on the adverse effects of naloxone?                                          | 19%                                                | 90%                                              | 72% (<0.001)                                                                                                         |
| How comfortable do you feel counseling a patient on safety and tolerability of naloxone?                                      | 15%                                                | 88%                                              | 73% (<0.001)                                                                                                         |
| How comfortable are you with counseling a patient on opioid overdose prevention?                                              | 21%                                                | 87%                                              | 66% (<0.001)                                                                                                         |
| How familiar are you with identifying the signs and symptoms of opioid withdrawal?                                            | 14%                                                | 89%                                              | 75% (<0.001)                                                                                                         |
| How familiar are you with identifying the signs and symptoms of an opioid overdose?                                           | 11%                                                | 89%                                              | 78% (<0.001)                                                                                                         |
| How comfortable would you feel responding to an opioid overdose?                                                              | 9%                                                 | 86%                                              | 77% (<0.001)                                                                                                         |
| How comfortable do you feel writing a prescription for naloxone?                                                              | 11%                                                | 92%                                              | 81% (<0.001)                                                                                                         |
| How comfortable do you feel typing a new prescription for naloxone?                                                           | 26%                                                | 93%                                              | 67% (<0.001)                                                                                                         |

**Table S2.** Survey results comparing student perception post-teaching and post-assessment.

|                                                                                                                               | Post-teaching<br>answering in<br>the<br>affirmative | Post-<br>assessment<br>answering in<br>the affirmative | Change in the<br>proportion<br>answering in<br>the affirmative<br>post-<br>assessment and<br>post-teaching<br>(p-value) |
|-------------------------------------------------------------------------------------------------------------------------------|-----------------------------------------------------|--------------------------------------------------------|-------------------------------------------------------------------------------------------------------------------------|
| How familiar are you with the risks of opioid overdose?                                                                       | 90%                                                 | 98%                                                    | 7% (<0.001)                                                                                                             |
| How familiar are you with the pharmacology of naloxone?                                                                       | 86%                                                 | 95%                                                    | 10% (<0.001)                                                                                                            |
| Do you believe that utilizing pharmacists to increase naloxone access can save lives?                                         | 98%                                                 | 95%                                                    | -3% (0.493)                                                                                                             |
| How familiar are you with the CA BOP protocol for pharmacists to furnish naloxone?                                            | 88%                                                 | 94%                                                    | 6% (0.004)                                                                                                              |
| How comfortable do you feel talking to patients about opioids?                                                                | 86%                                                 | 96%                                                    | 11% (<0.001)                                                                                                            |
| How comfortable do you feel talking to a patient about naloxone?                                                              | 86%                                                 | 98%                                                    | 11% (<0.001)                                                                                                            |
| How comfortable do you feel counseling a patient on the administration of intramuscular naloxone in a vial with a syringe?    | 72%                                                 | 84%                                                    | 12% (<0.001)                                                                                                            |
| How comfortable do you feel counseling a patient on the administration of commercially available Narcan nasal spray?          | 89%                                                 | 98%                                                    | 8% (<0.001)                                                                                                             |
| How comfortable do you feel counseling a patient on the administration of naloxone nasal spray kit with atomizer/white cones? | 79%                                                 | 87%                                                    | 7% (<0.001)                                                                                                             |
| How comfortable do you feel counseling a patient on the administration of Evzio?                                              | 77%                                                 | 89%                                                    | 12% (<0.001)                                                                                                            |
| How comfortable do you feel selecting the proper naloxone product and route for a patient?                                    | 83%                                                 | 93%                                                    | 10% (<0.001)                                                                                                            |
| How comfortable do you feel counseling a patient on the effectiveness of naloxone?                                            | 90%                                                 | 98%                                                    | 7% (<0.001)                                                                                                             |
| How comfortable do you feel counseling a patient on the adverse effects of naloxone?                                          | 90%                                                 | 96%                                                    | 6% (<0.001)                                                                                                             |
| How comfortable do you feel counseling a patient on safety and tolerability of naloxone?                                      | 88%                                                 | 96%                                                    | 8% (<0.001)                                                                                                             |
| How comfortable are you with counseling a patient on opioid overdose prevention?                                              | 87%                                                 | 96%                                                    | 9% (<0.001)                                                                                                             |
| How familiar are you with identifying the signs and symptoms of opioid withdrawal?                                            | 89%                                                 | 96%                                                    | 7% (<0.001)                                                                                                             |
| How familiar are you with identifying the signs and symptoms of an opioid overdose?                                           | 89%                                                 | 95%                                                    | 6% (<0.001)                                                                                                             |
| How comfortable would you feel responding to an opioid overdose?                                                              | 86%                                                 | 91%                                                    | 6% (<0.001)                                                                                                             |
| How comfortable do you feel writing a prescription for naloxone?                                                              | 92%                                                 | 98%                                                    | 6% (<0.001)                                                                                                             |
| How comfortable do you feel typing a new prescription for naloxone?                                                           | 93%                                                 | 96%                                                    | 4% (<0.001)                                                                                                             |

**Table S3.** Survey results comparing student perception pre-teaching and post-assessment.

|                                                                                                                               | Pre-teaching<br>answering in<br>the affirmative | Post-<br>assessment<br>answering in<br>the affirmative | Change in the<br>proportion<br>answering in<br>the affirmative<br>(p-value) |
|-------------------------------------------------------------------------------------------------------------------------------|-------------------------------------------------|--------------------------------------------------------|-----------------------------------------------------------------------------|
| How familiar are you with the risks of opioid overdose?                                                                       | 36%                                             | 98%                                                    | 61% (<0.001)                                                                |
| How familiar are you with the pharmacology of naloxone?                                                                       | 17%                                             | 95%                                                    | 78% (<0.001)                                                                |
| Do you believe that utilizing pharmacists to increase naloxone access can save lives?                                         | 92%                                             | 95%                                                    | 3% (0.005)                                                                  |
| How familiar are you with the CA BOP protocol for pharmacists to furnish naloxone?                                            | 7%                                              | 94%                                                    | 87% (<0.001)                                                                |
| How comfortable do you feel talking to patients about opioids?                                                                | 24%                                             | 96%                                                    | 72% (<0.001)                                                                |
| How comfortable do you feel talking to a patient about naloxone?                                                              | 27%                                             | 98%                                                    | 71% (<0.001)                                                                |
| How comfortable do you feel counseling a patient on the administration of intramuscular naloxone in a vial with a syringe?    | 15%                                             | 84%                                                    | 69% (<0.001)                                                                |
| How comfortable do you feel counseling a patient on the administration of commercially available Narcan nasal spray?          | 23%                                             | 98%                                                    | 75% (<0.001)                                                                |
| How comfortable do you feel counseling a patient on the administration of naloxone nasal spray kit with atomizer/white cones? | 17%                                             | 87%                                                    | 70% (<0.001)                                                                |
| How comfortable do you feel counseling a patient on the administration of Evzio?                                              | 9%                                              | 89%                                                    | 80% (<0.001)                                                                |
| How comfortable do you feel selecting the proper naloxone product and route for a patient?                                    | 10%                                             | 93%                                                    | 83% (<0.001)                                                                |
| How comfortable do you feel counseling a patient on the effectiveness of naloxone?                                            | 19%                                             | 98%                                                    | 78% (<0.001)                                                                |
| How comfortable do you feel counseling a patient on the adverse effects of naloxone?                                          | 19%                                             | 96%                                                    | 78% (<0.001)                                                                |
| How comfortable do you feel counseling a patient on safety and tolerability of naloxone?                                      | 15%                                             | 96%                                                    | 81% (<0.001)                                                                |
| How comfortable are you with counseling a patient on opioid overdose prevention?                                              | 21%                                             | 96%                                                    | 75% (<0.001)                                                                |
| How familiar are you with identifying the signs and symptoms of opioid withdrawal?                                            | 14%                                             | 96%                                                    | 83% (<0.001)                                                                |
| How familiar are you with identifying the signs and symptoms of an opioid overdose?                                           | 11%                                             | 95%                                                    | 84% (<0.001)                                                                |
| How comfortable would you feel responding to an opioid overdose?                                                              | 9%                                              | 91%                                                    | 83% (<0.001)                                                                |
| How comfortable do you feel writing a prescription for naloxone?                                                              | 11%                                             | 98%                                                    | 86% (<0.001)                                                                |
| How comfortable do you feel typing a new prescription for naloxone?                                                           | 26%                                             | 96%                                                    | 71% (<0.001)                                                                |
